# Supplementary material for: Preparation of Bisphenol-A and Polydimethylsiloxane (PDMS) Block Copolycarbonates by Melt Polycondensation: Effects of PDMS Chain Length on Conversion and Miscibility
Source: MDPI journal article supplement (doi:10.3390/polym13162660), 2021-08-10
Supplement: s1 [file s1]

Supporting Information for

**Preparation of Bisphenol-A and Polydimethylsiloxane (PDMS) Block  
Copolycarbonates by Melt Polycondensation: Effects of PDMS Chain  
Length on Conversion and Miscibility**

Zibo Zhou, and Guozhang Wu\*

Shanghai Key Laboratory of Advanced Polymeric Materials, School of Materials  
Science & Engineering, East China University of Science & Technology, Shanghai  
200237, China

\*Corresponding author. E-mail address: [wgz@ecust.edu.cn](mailto:wgz@ecust.edu.cn) (G. Wu).

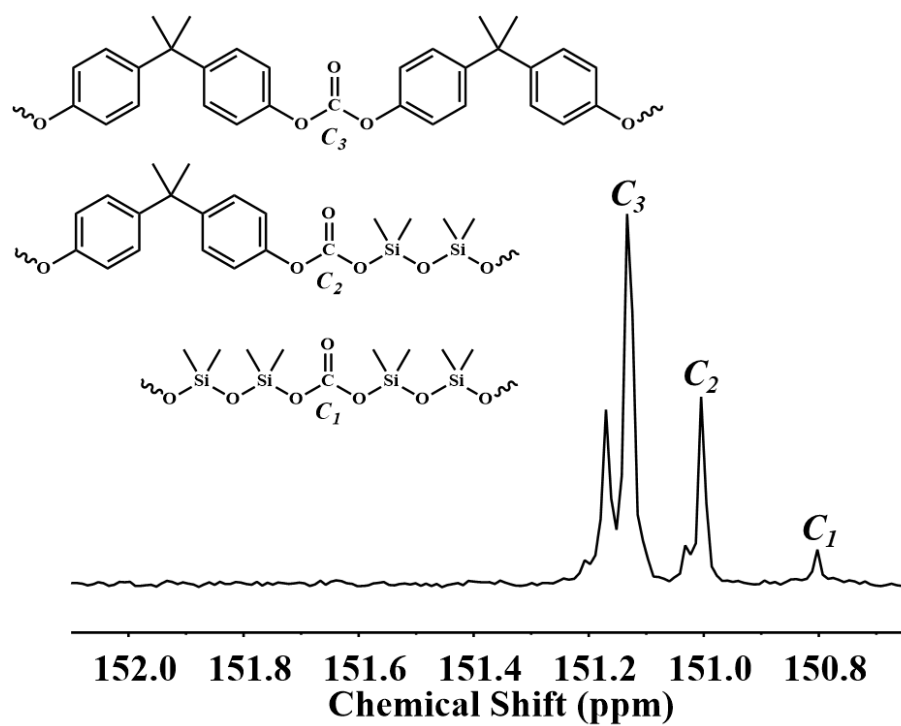

$$L_{\text{nBPA}} = \frac{C_2 + 2C_3}{C_2} \quad (1)$$

$$L_{\text{nPDMS}} = \frac{C_2 + 2C_1}{C_2} \quad (2)$$

$$B = \frac{1}{L_{\text{nBPA}}} + \frac{1}{L_{\text{nPDMS}}} \quad (3)$$

**Figure S1.** Typical  $^{13}\text{C}$ -NMR spectrum ( $\text{CDCl}_3$ , 150 MHz) of PC-PDMS copolymer and calculation of  $L_{\text{nBPA}}$ ,  $L_{\text{nPDMS}}$  and  $B$ .<sup>1</sup>

## Reference

- 1 Yamadera, R.; Murano, M. The determination of randomness in copolyesters by high resolution nuclear magnetic resonance. *J. Polym. Sci., Part A: Polym. Chem.* **1967**, 5, 2259-2268.
